# Supplementary material
Source: MDPI journal article supplement (https://www.mdpi.com/2227-9040/10/12/510)
Supplement: s1 [file s1]

Supplementary Information

# Ultrasensitive Fluorescent “ON-OFF” Label-Free Immunosensor for Detection of Vitellogenin of Marine Medaka

Chong Qi <sup>1</sup>, Ailing Yang <sup>1,\*</sup>, Huaidong Wang <sup>1</sup>, Zhenzhong Zhang <sup>2</sup> and Jun Wang <sup>2,\*</sup>

<sup>1</sup> College of Physics and Optoelectronic Engineering, Ocean University of China, Qingdao 266100, China

<sup>2</sup> College of Marine Life Sciences, Ocean University of China, Qingdao 266003, China

\* Correspondence: ailingy@ouc.edu.cn (A.Y.); wangjun@ouc.edu.cn (J.W.)

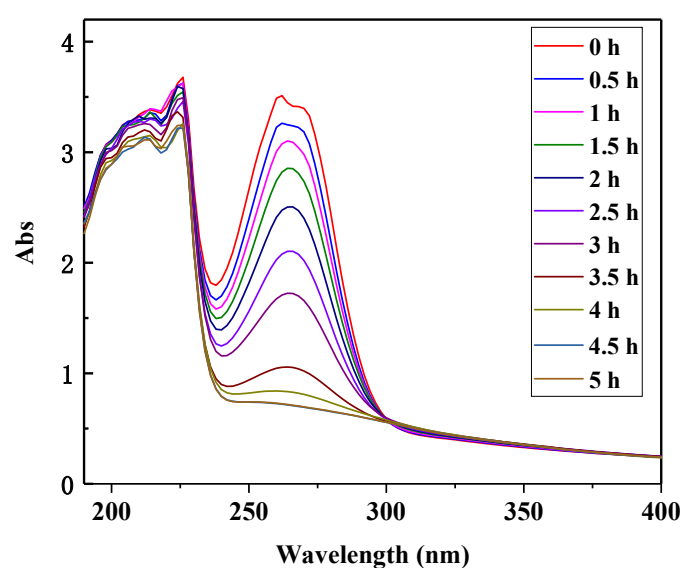

**Figure S1.** UV-Vis absorption spectra change with time during the reduction of GO.

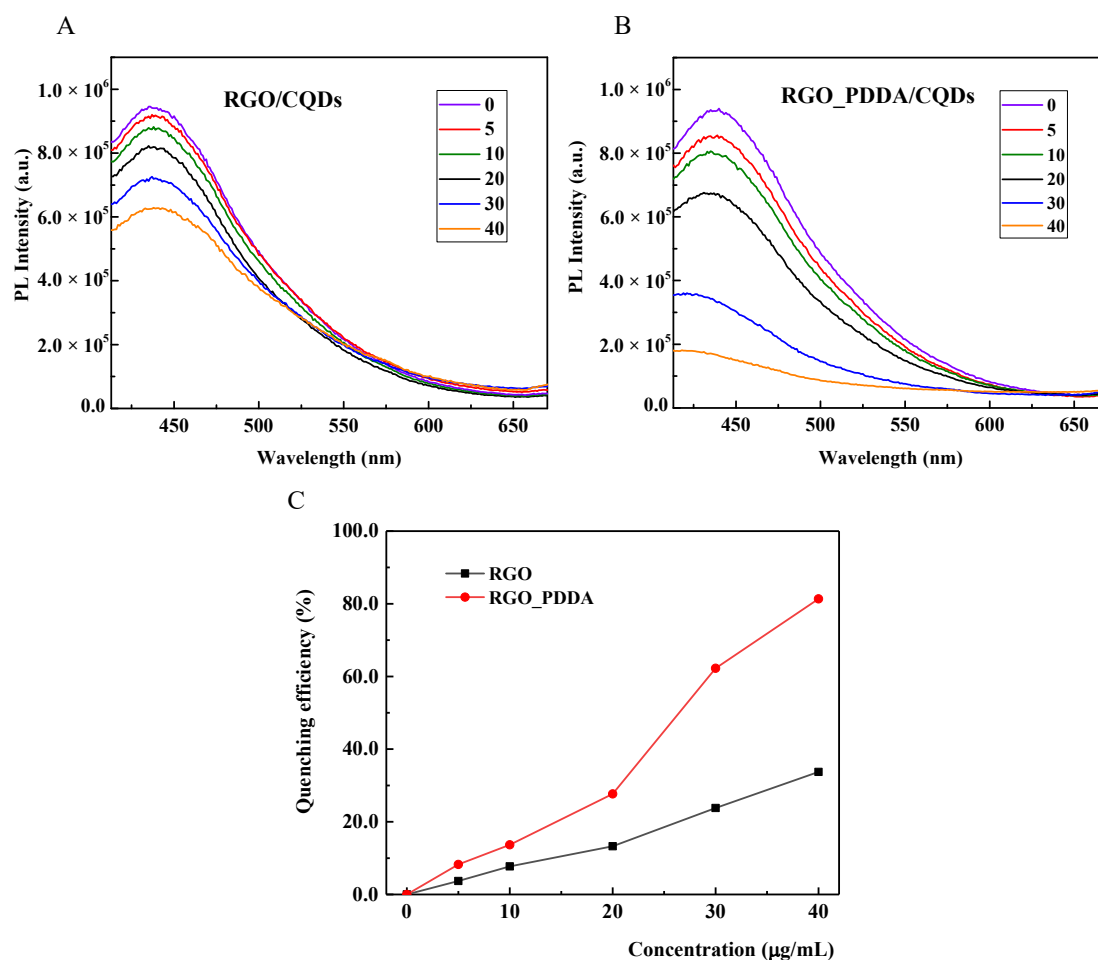

**Figure S2.** Effect of different concentration (0, 5, 10, 20, 30, 40  $\mu\text{g/mL}$ ) of (A) RGO and (B) RGO\_PDDA on fluorescence curve of CQDs, and (C) their corresponding fluorescence quenching efficiency.

#### *The Calculation of Detection Limits*

According to the linear relation  $I = 54324.76 + 28833.63 \log(c_{\text{Vtg}})$  and  $S/N = 4$ , we can obtain the following formula to calculate the LOD:

$$4N = 54324.76 + 28833.63 \log(\text{LOD}) \quad (\text{S1})$$

The average noise signal ( $N$ ) of multiple blank samples measured by us is 3504.27, and  $\text{LOD} = 0.04$  can be obtained.
